# Supplementary material for: Direct photomodulation of peptide backbone conformationsElectronic Supplementary Information (ESI) available: details of the monochromatic light source, kinetic parameters, UV-vis spectroscopy and capillary electrophoresis. See http://www.rsc.org/suppdata/cc/b3/b309927j/
Source: Royal Society of Chemistry journal article supplement (doi:10.1039/b309927j), 2003-01-01
Supplement: b309927j.doc [file b309927j.doc]

# SUPPORTING INFORMATION

FOR

Direct photomodulation of the peptide backbone conformations

Jianzhang Zhao,* Dirk Wildemann, Mario Jakob, Carolyn Vargas, Cordelia Schiene-Fischer*

*¶ Dr. Jianzhang Zhao, Dirk Wildemann, Mario Jakob, Carolyn Vargas, Dr. Cordelia Schiene-Fischer,

Max Planck Research Unit for Enzymology of Protein Folding

Weinbergweg 22

06120 Halle/Saale

Germany

E-mail: j.zhao@bath.ac.uk

¶ Present address: Department of Chemistry, University of Bath, Bath BA2 7AY, Bath, UK.

## Experimental Section

Peptide **1**-**5** were synthesized with the routine method for the synthesis of the thioxopeptides.[1] Synthesis of s-peptide was based on solid Fmoc chemistry.[2] The products were lyophilized and proved with HPLC, MS(ESI), 1H NMR and 13C NMR methods to be in accordance with the proposed structure. A UV lamp was used in the irradiation at 254 nm with a light intensity of 2.0 mW cm-2. In order to irradiate the sample at different wavelength, a home-assembled monochromatic light source was used, the optical building blocks include Hamamatsu E7356 Precision lamp housing with Hamamatsu L2423 200 W Mercury-Xenon lamp (Japan), PTI 101 monochromator (USA), Lot-Oriel fiber bundle focusing assembly (USA) and LOT-Oriel fused quartz fiber bundle (Germany). A 2 mm slit width of the monochromator was manually set. Under these conditions, the typical light intensity exit from the fiber bundle is 0.1 mW. Data analysis of the UV absorption time courses was performed by single-exponential nonlinear regression using a SigmaPlot Scientific Graphing System Vers.2000, and gave the isomerization rate constants (*k*c/t = *kcistrans* + *ktranscis*). Apparent rate constant *k** was used to characterize the photokinetic process, where  represents the irradiation wavelength (nm).

**UV/Vis difference spectra**. The irradiation-mediated UV/Vis difference spectra for the peptide bond of the peptides were evaluated by subtracting the spectrum of the peptide in the PSS (254 nm UV lamp) from the spectrum before irradiation. A Hewlett Packard 8452A Diode Array UV/Vis spectrophotometer was used. An integration time of 0.1 s was used for the acquirement of the UV/Vis spectra.

Time course of *cis*/*trans* isomerization of the thioxopeptide bonds with photoswitch. For determination of the thermal relaxation, The peptide solution (1.410-4 M in 0.05 M sodium phosphate buffer) was irradiated with UV lamp at the desired pH and temperature. After irradiation, the time courses at 290 nm were monitored with Perkin Elmer UV/VIS/NIR spectrometer Lambda 900. Slit width was set as 0.2 nm. The solution was stirred continuously with a magnetic stirring bar within the UV cuvette (1 cm). The temperature of the UV cuvette holder was controlled by circulating water from a thermostat (Haake D8, Germany). The temperature was measured with a microthermoprobe within the UV cuvette.

In order to irradiate the peptide sample at different wavelength, the HP 8452A spectrometer and the home-assembled monochromic light source was used. The photon flux is directed onto the UV cuvette via the fiber bundle perpendicular to the measurement beam of the HP 8452 A diode array spectrophotometer. The peptide solution in a 1 cm UV cuvette was well stirred with a hydrodynamiclly-driven magnetic bar (the speed could be control to ensure the establishment of a pure photokinetic process and the final photostationary state). The cuvette holder inside the HP 8452A spectrophotometer was kept at 160.1C (measured with a micro thermal probe directly within the cuvette) by circulating water from a thermostat (Haake D8, Germany).

In order to determine the rotational activation entropy and the enthalpy of the thioxopeptide bonds, the temperature dependence of the isomerization rate constants was studied, the isomerization rate constants at different temperature were fitted to the Erying equation:

ln(*k*c/t/T) = (-H/*R*)/(1/T) + S/*R* + ln(*k*B/*h*)

where *R* is the universal gas constant; *k*B is the Boltzmann constant; *h* is the Planck’s constant. For the reproducibility of the *k*c/t, the average relative range (R) of the measurements is (*k*c/tmax-*k*c/tmin)/*k*c/taverage= 4.2%, which means the variation of different measurement is small (every *k*c/t value was measured for 3 times). For the data of peptide 1 and 2, the *k*c/tvalues are determined at pH6.0 (in the pH5-7 region, the *k*c/tvalues are not sensitive to the change of pH, data not shown here). For the fitting the Erying equations (Table 1), *r*2 values ranges from 0.998 to 1.000, which means a perfect linear fitting.

Table 1 Cis/trans isomerization rate constants (*k*c/t), activation enthalpies(*H*) and activation entropies (*S*) of peptide 1-5.

| Peptide | *k*c/t*a*  (s-1) | *H* *b*  (kJ mol-1) | *T**S c*  (kJ mol-1) |
| --- | --- | --- | --- |
| 1  2  3  4  5 | (9.780.02) 10-4  (2.000.02) 10-3  (2.390.04) 10-3  (9.500.21) 10-3  (4.830.01) 10-3 | 74.40.7  80.31.4  68.90.7  64.70.9  82.52.8 | -13.20.7  -5.51.4  -16.40.7  -17.40.9  -0.92.9 |
| *a* 16C, pH7.0. *b* From Erying plot. *c* from Erying plot. 27C. | | | |

Capillary electrophoresis (CE). A high performance Beckman P/ACE system MDQ capillary electrophoresis instrument was used, the pH value of the separation buffer (0.05 M sodium phosphate) equals to that of the sample buffer (275 K, 3025 m fused silica capillary, 25 kV of separation voltage). In order to determine the CE at low temperature,[3] the CE instrument was put in a climate control unit (with temperature and humidity conditioning). The irradiated peptide solution was transferred into the CE instrument immediately after the irradiation, a typical time interval between the termination of the irradiation and the start of the measurement was 2 min. The extrapolating to PSS was based on this dead time of the measurement and the corresponding isomerization rate constants. In order to calculate the relative amount of the cis and the trans conformers, the isosbestic point of the UV-Vis absorptions of the cis and the trans conformers, 274 nm, was used to record the CE curves. At this wavelength, the peak areas ratio of the cis and the trans conformer is directly related to the relative population of the cis and trans conformers. The *cis/trans* ratios were determined by Gaussian peak fitting.

[1] a. R. Frank, M. Jakob, F. Thunecke, G. Fischer, M. Schutkowski, *Angew. Chem. Int. Ed.*, ***2000***, *39*, 1120;b*.* M. Schutkowski, S. Woellner, G. Fischer, *Biochemistry*, ***1995***, *34*, 13016.

[2] D. Wildemann, M. Drewello, G. Fischer, M. Schutkowski, Chem. Comm., ***1999***, 1809.

[3] F. Thunecke, G. Fischer, *Electrophoresis*, ***1998***, *19*, 288.
